# Supplementary material
Source: PubMed Central journal article supplement (PMC3602763)
Supplement: mmc1.pdf [file mmc1.pdf]

## Supporting Material

### Minimal models for cell cycle control based on competitive inhibition and multisite phosphorylations of Cdk substrates

Claude Gérard<sup>1</sup>, John J Tyson<sup>2</sup> and Béla Novák<sup>1</sup>

<sup>1</sup>Oxford Centre for Integrative Systems Biology,  
Department of Biochemistry, University of Oxford,  
South Parks Road, Oxford OX1 3QU, UK

<sup>2</sup> Department of Biological Sciences,  
Virginia Polytechnic Institute and State University,  
Blacksburg, VA, USA

#### Supplement 1: Parameters of the five models

| <u>Symbol</u>                                                                                                      | <u>Definition</u>                                               | <u>Numerical value</u> |
|--------------------------------------------------------------------------------------------------------------------|-----------------------------------------------------------------|------------------------|
| 1) Model with two groups of substrates (S & M) and one step of phosphorylation/dephosphorylation (Figs. 1 and 3A)  |                                                                 |                        |
| $K_{1S}$                                                                                                           | Michaelis constant for phosphorylation of S substrates          | 0.002                  |
| $K_{2S}$                                                                                                           | Michaelis constant for dephosphorylation of $S_P$ substrates    | 0.04                   |
| $K_{1M}$                                                                                                           | Michaelis constant for phosphorylation of M substrates          | 0.04                   |
| $K_{2M}$                                                                                                           | Michaelis constant for dephosphorylation of $M_P$ substrates    | 0.002                  |
| $S_T$                                                                                                              | Total concentration of substrates required for DNA replication  | 1                      |
| $M_T$                                                                                                              | Total concentration of substrates required for mitosis          | 1                      |
| $k_{1S}$                                                                                                           | Rate constant for the phosphorylation of S substrates           | 3.6                    |
| $V_{2S}$                                                                                                           | Maximum dephosphorylation rate of $S_P$ substrates              | 1                      |
| $k_{1M}$                                                                                                           | Rate constant for the phosphorylation of M substrates           | 1                      |
| $V_{2M}$                                                                                                           | Maximum dephosphorylation rate of $M_P$ substrates              | 0.2                    |
| 2) Model with two groups of substrates (S & M) and two steps of phosphorylation/dephosphorylation (Figs. 2 and 3B) |                                                                 |                        |
| $K_{1S}$                                                                                                           | Michaelis constant for phosphorylation of S substrates          | 0.002                  |
| $K_{2S}$                                                                                                           | Michaelis constant for dephosphorylation of $S_P$ substrates    | 0.04                   |
| $K_{3S}$                                                                                                           | Michaelis constant for phosphorylation of $S_P$ substrates      | 0.002                  |
| $K_{4S}$                                                                                                           | Michaelis constant for dephosphorylation of $S_{PP}$ substrates | 0.04                   |

|                                                                                                                                                          |                                                                 |       |
|----------------------------------------------------------------------------------------------------------------------------------------------------------|-----------------------------------------------------------------|-------|
| $K_{1M}$                                                                                                                                                 | Michaelis constant for phosphorylation of M substrates          | 0.04  |
| $K_{2M}$                                                                                                                                                 | Michaelis constant for dephosphorylation of $M_P$ substrates    | 0.002 |
| $K_{3M}$                                                                                                                                                 | Michaelis constant for phosphorylation of $M_P$ substrates      | 0.04  |
| $K_{4M}$                                                                                                                                                 | Michaelis constant for dephosphorylation of $M_{PP}$ substrates | 0.002 |
| $k_{1S}$                                                                                                                                                 | Rate constant for the phosphorylation of S substrates           | 10    |
| $V_{2S}$                                                                                                                                                 | Maximum dephosphorylation rate of $S_P$ substrates              | 1.5   |
| $k_{3S}$                                                                                                                                                 | Rate constant for the phosphorylation of $S_P$ substrates       | 25    |
| $V_{4S}$                                                                                                                                                 | Maximum dephosphorylation rate of $S_{PP}$ substrates           | 0.25  |
| $k_{1M}$                                                                                                                                                 | Rate constant for the phosphorylation of M substrates           | 0.6   |
| $V_{2M}$                                                                                                                                                 | Maximum dephosphorylation rate of $M_P$ substrates              | 0.3   |
| $k_{3M}$                                                                                                                                                 | Rate constant for the phosphorylation of $M_P$ substrates       | 0.8   |
| $V_{4M}$                                                                                                                                                 | Maximum dephosphorylation rate of $M_{PP}$ substrates           | 0.05  |
| $S_T$                                                                                                                                                    | Total concentration of substrates required for DNA replication  | 1     |
| $M_T$                                                                                                                                                    | Total concentration of substrates required for mitosis          | 1     |
| 3) Minimal oscillator: Cdk/cyclin – APC – Sec (Fig. 4)                                                                                                   |                                                                 |       |
| $APC_T$                                                                                                                                                  | Total concentration of APC/Cdc20                                | 1     |
| $K_{1APC}$                                                                                                                                               | Michaelis constant for dephosphorylation of $APC_P$             | 0.01  |
| $K_{2APC}$                                                                                                                                               | Michaelis constant for phosphorylation of APC                   | 0.01  |
| $V_{1APC}$                                                                                                                                               | Maximum dephosphorylation rate of $APC_P$                       | 0.15  |
| $k_{2APC}$                                                                                                                                               | Maximum phosphorylation rate of APC                             | 0.3   |
| $V_{scdk}$                                                                                                                                               | Rate of synthesis of Cdk/cyclin                                 | 0.06  |
| $k_{d1cdk}$                                                                                                                                              | Rate constant for non-specific degradation of Cdk/cyclin        | 0.01  |
| $k_{dcdk}$                                                                                                                                               | Maximum rate for Cdk/cyclin degradation by $APC_P$              | 0.35  |
| $K_{dcdk}$                                                                                                                                               | Michaelis constant for Cdk/cyclin degradation by $APC_P$        | 0.01  |
| $V_{ssec}$                                                                                                                                               | Rate of synthesis of securin                                    | 0.1   |
| $k_{d1sec}$                                                                                                                                              | Rate constant for non-specific securin degradation              | 0.01  |
| $k_{dsec}$                                                                                                                                               | Maximum rate for securin degradation by $APC_P$                 | 0.4   |
| $K_{dsec}$                                                                                                                                               | Michaelis constant for securin degradation by $APC_P$           | 0.001 |
| 4) Intermediate model with dual phosphorylation of APC (M)<br>(Fig. 5). For the other parameter values, see sections 2 and 3 above.                      |                                                                 |       |
| $V_{4M}$                                                                                                                                                 | Maximum dephosphorylation rate of $M_{PP}$ substrates           | 0.15  |
| 5) Full model with S promoting the degradation of Cdk/cyclin and securin<br>(Figs. 6 and 7). For the other parameter values, see sections 2 and 3 above. |                                                                 |       |
| $K_{1S}$                                                                                                                                                 | Michaelis constant for phosphorylation of S substrates          | 0.008 |
| $K_{2S}$                                                                                                                                                 | Michaelis constant for dephosphorylation of $S_P$ substrates    | 0.008 |
| $K_{3S}$                                                                                                                                                 | Michaelis constant for phosphorylation of $S_P$ substrates      | 0.008 |
| $K_{4S}$                                                                                                                                                 | Michaelis constant for dephosphorylation of $S_{PP}$ substrates | 0.008 |
| $K_{1M}$                                                                                                                                                 | Michaelis constant for phosphorylation of M substrates          | 0.1   |
| $K_{2M}$                                                                                                                                                 | Michaelis constant for dephosphorylation of $M_P$ substrates    | 0.008 |

|             |                                                                 |       |
|-------------|-----------------------------------------------------------------|-------|
| $K_{3M}$    | Michaelis constant for phosphorylation of $M_P$ substrates      | 0.1   |
| $K_{4M}$    | Michaelis constant for dephosphorylation of $M_{PP}$ substrates | 0.008 |
| $k_{1S}$    | Rate constant for the phosphorylation of $S$ substrates by Cdk  | 12    |
| $V_{2S}$    | Maximum dephosphorylation rate of $S_P$ substrates              | 0.4   |
| $k_{3S}$    | Rate constant for the phosphorylation of $S_P$ substrates       | 10    |
| $V_{4S}$    | Maximum dephosphorylation rate of $S_{PP}$ substrates           | 0.47  |
| $k_{1M}$    | Rate constant for the phosphorylation of $M$ substrates         | 0.15  |
| $V_{2M}$    | Maximum dephosphorylation rate of $M_P$ substrates              | 0.3   |
| $k_{3M}$    | Rate constant for the phosphorylation of $M_P$ substrates       | 0.6   |
| $V_{4M}$    | Maximum dephosphorylation rate of $M_{PP}$ substrates           | 0.1   |
| $V_{scdk}$  | Rate of synthesis of Cdk/cyclin                                 | 0.03  |
| $V_{ssec}$  | Rate of synthesis of securin                                    | 0.03  |
| $k_{dcdk}$  | Maximum rate for Cdk/cyclin degradation by $APC_{PP}$           | 0.2   |
| $K_{dcdk}$  | Michaelis constant for Cdk/cyclin degradation by $APC_{PP}$     | 0.02  |
| $k_{dcdk2}$ | Rate constant for degradation of Cdk/cyclin promoted by Cdh1    | 0.2   |
| $k_{d1cdk}$ | Rate constant for non-specific degradation of Cdk/cyclin        | 0.001 |
| $k_{d1sec}$ | Rate constant for non-specific degradation of securin           | 0.015 |
| $k_{dsec}$  | Rate constant for degradation of securin by $APC_{PP}$          | 0.15  |
| $k_{dsec2}$ | Rate constant for degradation of securin promoted by Cdh1       | 0.3   |
| $\mu$       | Specific growth rate                                            | 0.004 |

**Notes:**

The minimal models proposed here could represent the cell cycle dynamics of ‘primitive’ eukaryotes. Having no knowledge of what might have been the values of these kinetic parameters in a primitive eukaryote, we have chosen a set of ‘representative’ dimensionless parameter values. In addition, we have assumed that the phosphorylation and dephosphorylation of substrates are described by Goldbeter-Koshland switches (1), which rely on zero-order ultrasensitivity (ZOU). ZOU requires that the Michaelis constants for the phosphorylation and dephosphorylation reactions are small compared to the total concentration of the substrates. This assumption can be justified by the facts that the Michaelis-Menten constants for the phosphorylation of substrates by Cdk and their dephosphorylation by phosphatases are in the micromolar range (2, 3), whereas the total concentration of Cdk1 phosphorylation sites in a cell could be in the millimolar range (4), because Cdk1 has hundreds of targets in the cell, most of which likely have multiple phosphorylation sites.

In order to get two separate bistable domains with ordered thresholds for the phosphorylation of  $S$  and  $M$  pools of substrates (see Fig. 2), we must assume that the rate of phosphorylation of the  $S$  pool of substrates is faster than the rate of phosphorylation of the  $M$  pool of substrates.

In the parameter sets used here, the rates of first-phosphorylation steps are typically slower

than the rates of second-phosphorylation steps (e.g., compare  $k_{1S}$  with  $k_{3S}$  and  $k_{1M}$  with  $k_{3M}$  in section 2 above in the Supplement 1). This choice can be justified by the fact that cooperativity involving multiple phosphorylations has been observed in diverse biological systems (5-7). Nonetheless, this inequality is not a crucial assumption of our models (e.g., compare  $k_{1S}$  with  $k_{3S}$  in section 5 above in the Supplement 1).

To compensate for our lack of knowledge about parameter values, we performed many bifurcation analyses (see Figs. 1-7), which bring to light the dynamical behaviors of the models as parameter values vary. In our experience, the dynamical properties of these models depend more on their network structure than on precise values of the parameters.

### Supplement 2: Domain of bistability for the singly phosphorylated substrates model

The singly phosphorylated substrates model (see Fig. 1A) exhibits one domain of bistability in the phosphorylation state of S and M substrates. Indeed, only one domain of bistability is observed in the simulations of the model (see Figs. 1B, 1C and 3A). Furthermore, by introducing concentrations relative to Michaelis constants ( $S' = S/K_{1S}$ ,  $S_p' = S_p/K_{2S}$ ,  $M' = M/K_{1M}$  and  $M_p' = M_p/K_{2M}$ ), the kinetic equations (1) and (2) can be re-written as:

$$k_{1S} \cdot Cdk \cdot \frac{S'}{1 + M' + S'} = V_{2S} \cdot \frac{S_p'}{1 + M_p' + S_p'}$$

$$k_{1M} \cdot Cdk \cdot \frac{M'}{1 + S' + M'} = V_{2M} \cdot \frac{M_p'}{1 + S_p' + M_p'}$$

After dividing one equation by the other and re-arranging, we obtained that:

$$\frac{k_{1S}}{k_{1M}} \frac{S'}{S_p'} = \frac{V_{2S}}{V_{2M}} \frac{M'}{M_p'}$$

This formula shows that the ratio of phosphorylated and unphosphorylated forms of S and M are independent of Cdk activity, which is only possible if there is only one bistable regime.

### Supporting References

1. Goldbeter, A., and D. E. Koshland, Jr. 1981. An amplified sensitivity arising from covalent modification in biological systems. *Proc Natl Acad Sci U S A* 78:6840-6844.
2. Bouchoux, C., and F. Uhlmann. 2011. A quantitative model for ordered Cdk substrate dephosphorylation during mitotic exit. *Cell* 147:803-814.
3. Loog, M., and D. O. Morgan. 2005. Cyclin specificity in the phosphorylation of cyclin-dependent kinase substrates. *Nature* 434:104-108.

4. Koivomagi, M., E. Valk, R. Venta, A. Iofik, M. Lepiku, D. O. Morgan, and M. Loog. 2011. Dynamics of Cdk1 substrate specificity during the cell cycle. *Mol Cell* 42:610-623.
5. Schweiger, R., and M. Linial. 2010. Cooperativity within proximal phosphorylation sites is revealed from large-scale proteomics data. *Biol Direct* 5:6.
6. Weinman, E. J., D. Steplock, Y. Zhang, R. Biswas, R. J. Bloch, and S. Shenolikar. 2010. Cooperativity between the phosphorylation of Thr95 and Ser77 of NHERF-1 in the hormonal regulation of renal phosphate transport. *J Biol Chem* 285:25134-25138.
7. Pullen, N., N. G. Brown, R. P. Sharma, and M. Akhtar. 1993. Cooperativity during multiple phosphorylations catalyzed by rhodopsin kinase: supporting evidence using synthetic phosphopeptides. *Biochemistry* 32:3958-3964.
